# Supplementary material for: Integrated design and construction of the NiMoS4@Co9S8/Ni3S2 hollow core–shell heterostructure for high-performance asymmetric supercapacitors
Source: Royal Society of Chemistry journal article supplement (doi:10.1039/d3nj04837c), 2024-01-01
Supplement: d3nj04837c1.pdf [file d3nj04837c1.pdf]

## Supporting Information

### **Integrated design and construction of NiMoS<sub>4</sub>@Co<sub>9</sub>S<sub>8</sub>/Ni<sub>3</sub>S<sub>2</sub> hollow core-shell heterostructure for high-performance asymmetric supercapacitor**

Gaigai Yu,<sup>a,#</sup> Lei Wu,<sup>a,#</sup> Shijie Huang,<sup>c</sup> Wenna Zhao,<sup>b,\*</sup> and Lei Han<sup>a,\*</sup>

<sup>a</sup> State Key Laboratory Base of Novel Functional Materials and Preparation Science, School of Materials Science and Chemical Engineering, Ningbo University, Ningbo, Zhejiang 315211, China. E-mail: [hanlei@nbu.edu.cn](mailto:hanlei@nbu.edu.cn).

<sup>b</sup> School of Biological and Chemical Engineering, Ningbotech University, Ningbo, Zhejiang 315100, China. E-mail: [wenzhao@nit.zju.edu.cn](mailto:wenzhao@nit.zju.edu.cn).

<sup>c</sup> Ningbo Customs District Technology Center, Ningbo, Zhejiang 315048, China.

<sup>#</sup> These authors contributed equally to this work.

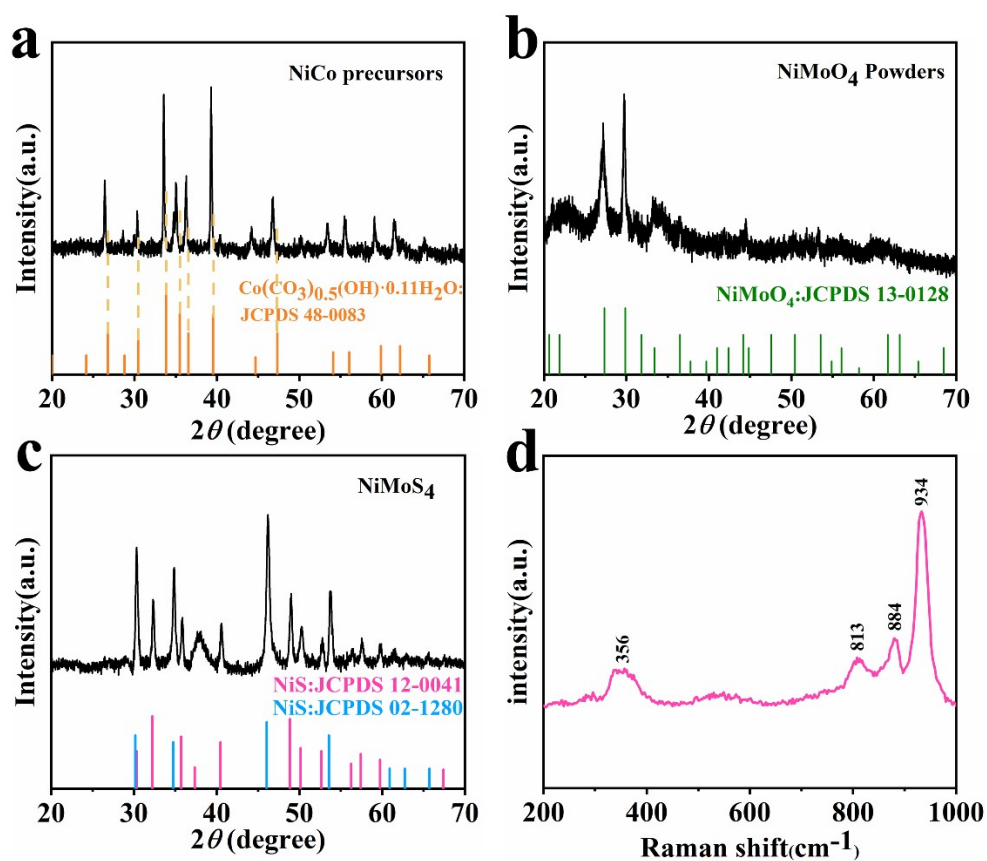

**Fig. S1.** XRD patterns of (a) NiCoCH precursors, (b) NiMoO<sub>4</sub> powders (c) NiMoS<sub>4</sub>; Raman spectra of (d) NiMoS<sub>4</sub>.

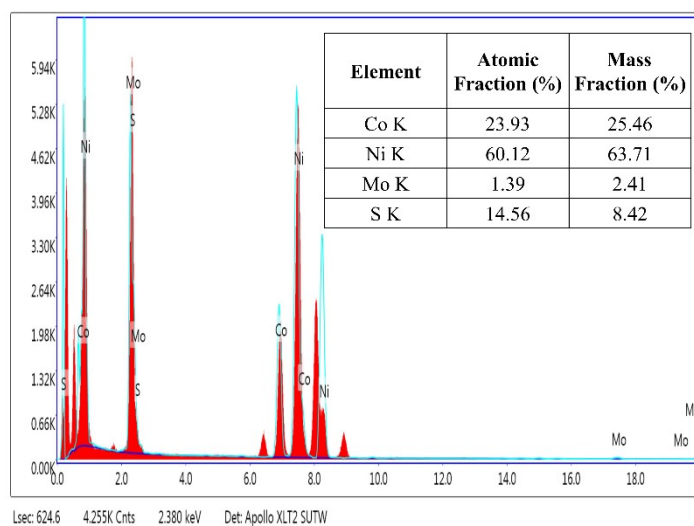

**Fig. S2.** EDAX spectrum of NiMoS<sub>4</sub>@Co<sub>9</sub>S<sub>8</sub>/Ni<sub>3</sub>S<sub>2</sub>.

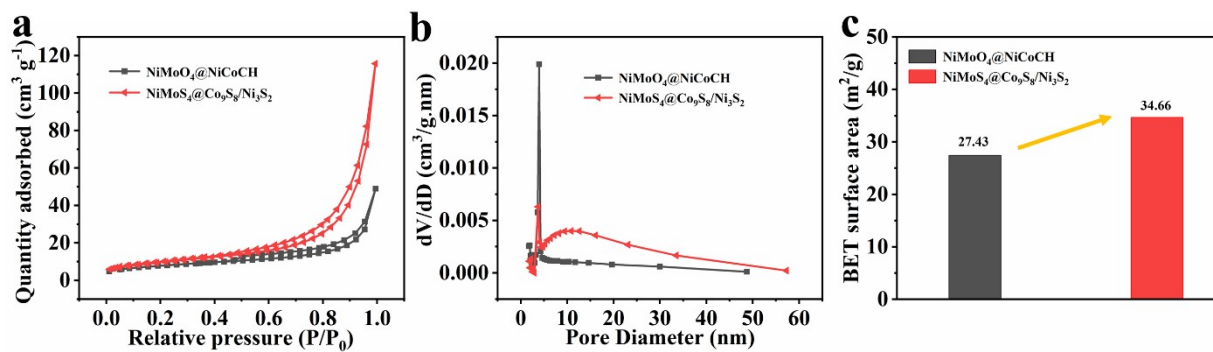

**Fig. S3.** (a) Nitrogen adsorption-desorption isotherms of NiMoO<sub>4</sub>@NiCoCH and NiMoS<sub>4</sub>@Co<sub>9</sub>S<sub>8</sub>/Ni<sub>3</sub>S<sub>2</sub>; (b) The pore size distribution of NiMoO<sub>4</sub>@NiCoCH and NiMoS<sub>4</sub>@Co<sub>9</sub>S<sub>8</sub>/Ni<sub>3</sub>S<sub>2</sub>; (c) BET specific surface area.

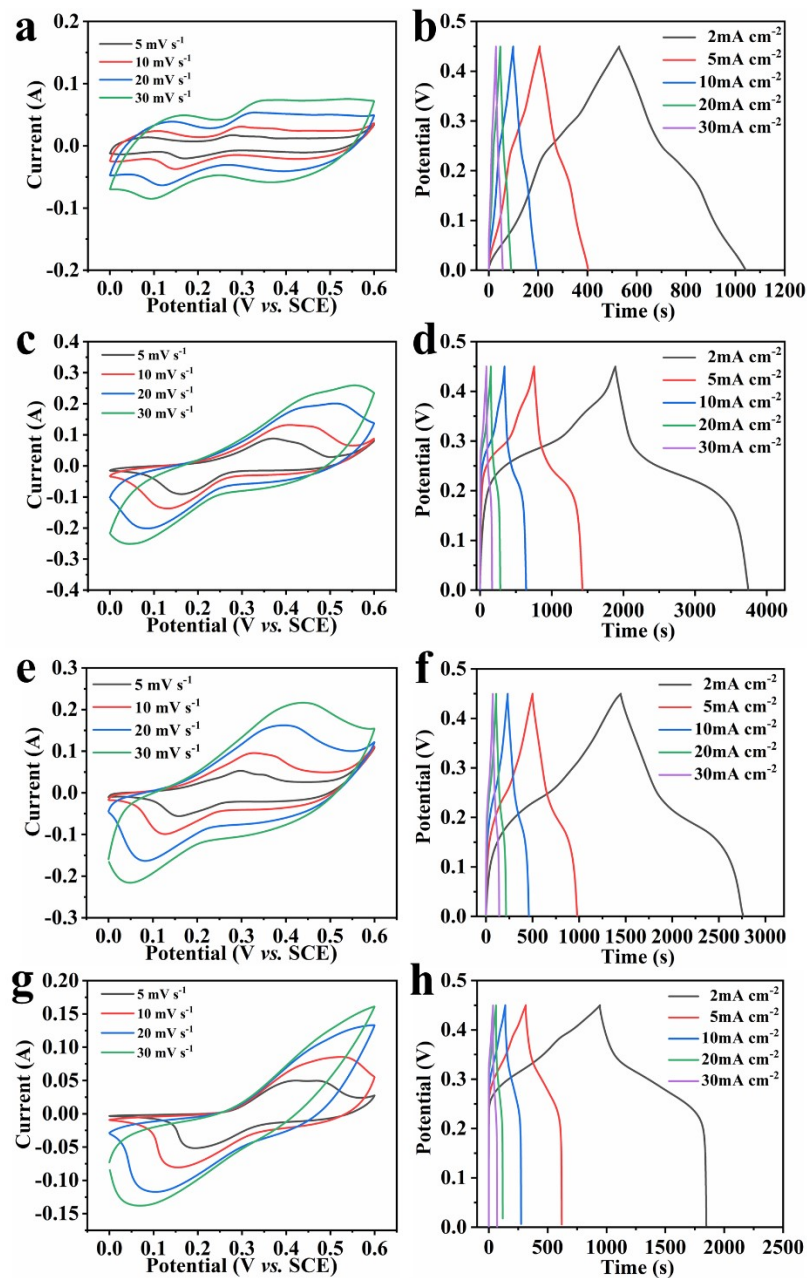

**Fig. S4.** (a, c, e and g) CV curves of NiCoCH/NF, NiMoS<sub>4</sub>@Co<sub>9</sub>S<sub>8</sub>/Ni<sub>3</sub>S<sub>2</sub>/NF, Co<sub>9</sub>S<sub>8</sub>/Ni<sub>3</sub>S<sub>2</sub>/NF and NiMoS<sub>4</sub>/NF; (b, d, f and h) GCD curves of NiCoCH/NF, NiMoS<sub>4</sub>@Co<sub>9</sub>S<sub>8</sub>/Ni<sub>3</sub>S<sub>2</sub>/NF, Co<sub>9</sub>S<sub>8</sub>/Ni<sub>3</sub>S<sub>2</sub>/NF and NiMoS<sub>4</sub>/NF.

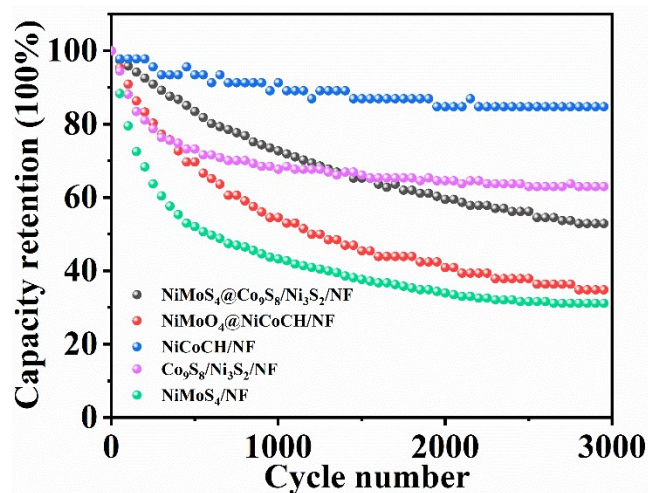

**Fig. S5.** The cycle stability of NiCoCH/NF, NiMoO<sub>4</sub>@NiCoCH/NF, NiMoS<sub>4</sub>/NF, Co<sub>9</sub>S<sub>8</sub>/Ni<sub>3</sub>S<sub>2</sub>/NF and NiMoS<sub>4</sub>@Co<sub>9</sub>S<sub>8</sub>/Ni<sub>3</sub>S<sub>2</sub>/NF.

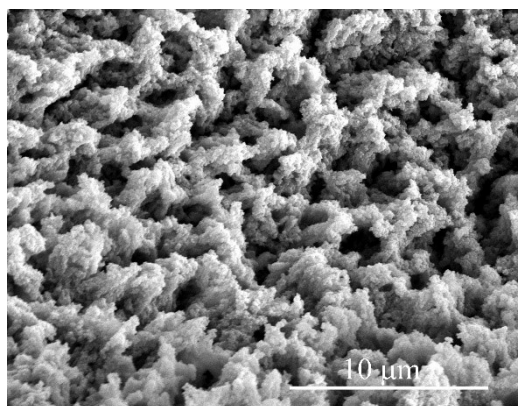

**Fig. S6.** SEM images of NiMoS<sub>4</sub>@Co<sub>9</sub>S<sub>8</sub>/Ni<sub>3</sub>S<sub>2</sub>/NF after 3000 cycles.

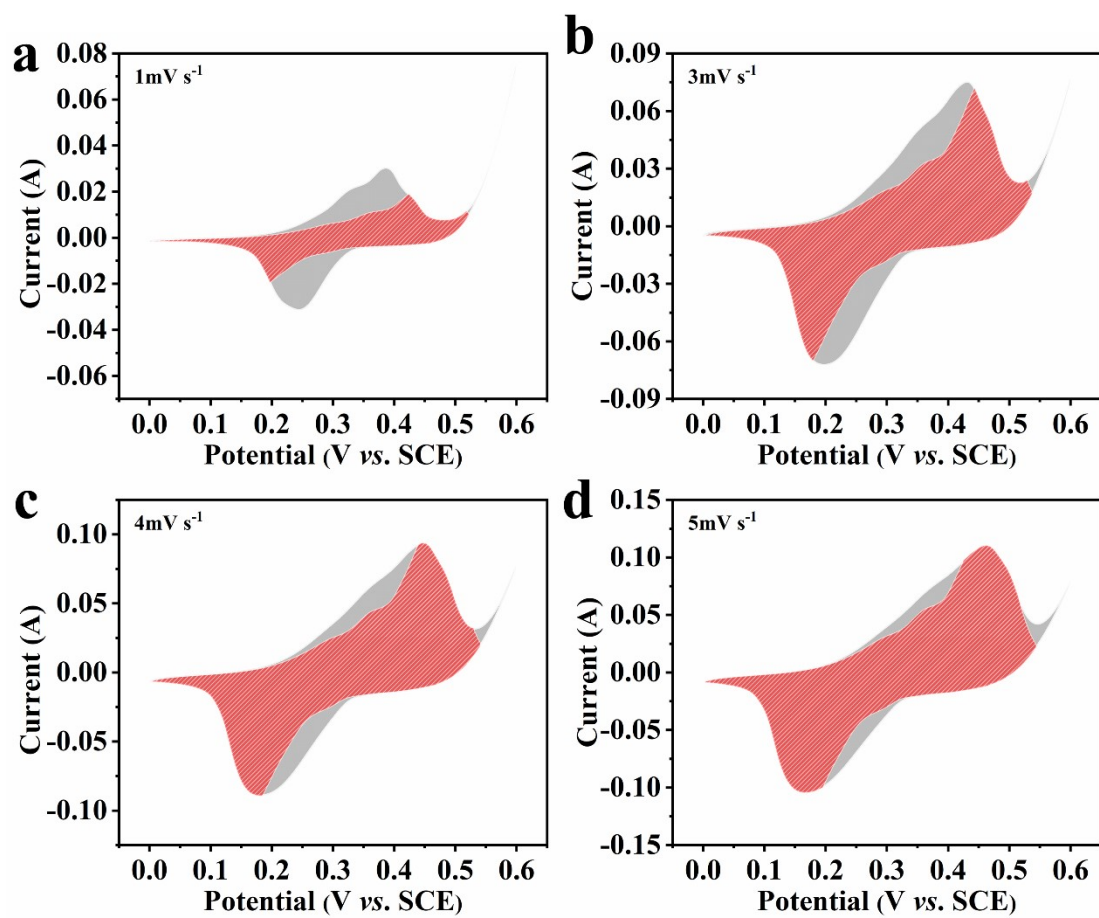

Fig. S7. Capacitive contribution (red) during charge storage at (a)  $1 \text{ mV s}^{-1}$ , (b)  $3 \text{ mV s}^{-1}$ , (c)  $4 \text{ mV s}^{-1}$ , (d)  $5 \text{ mV s}^{-1}$ .

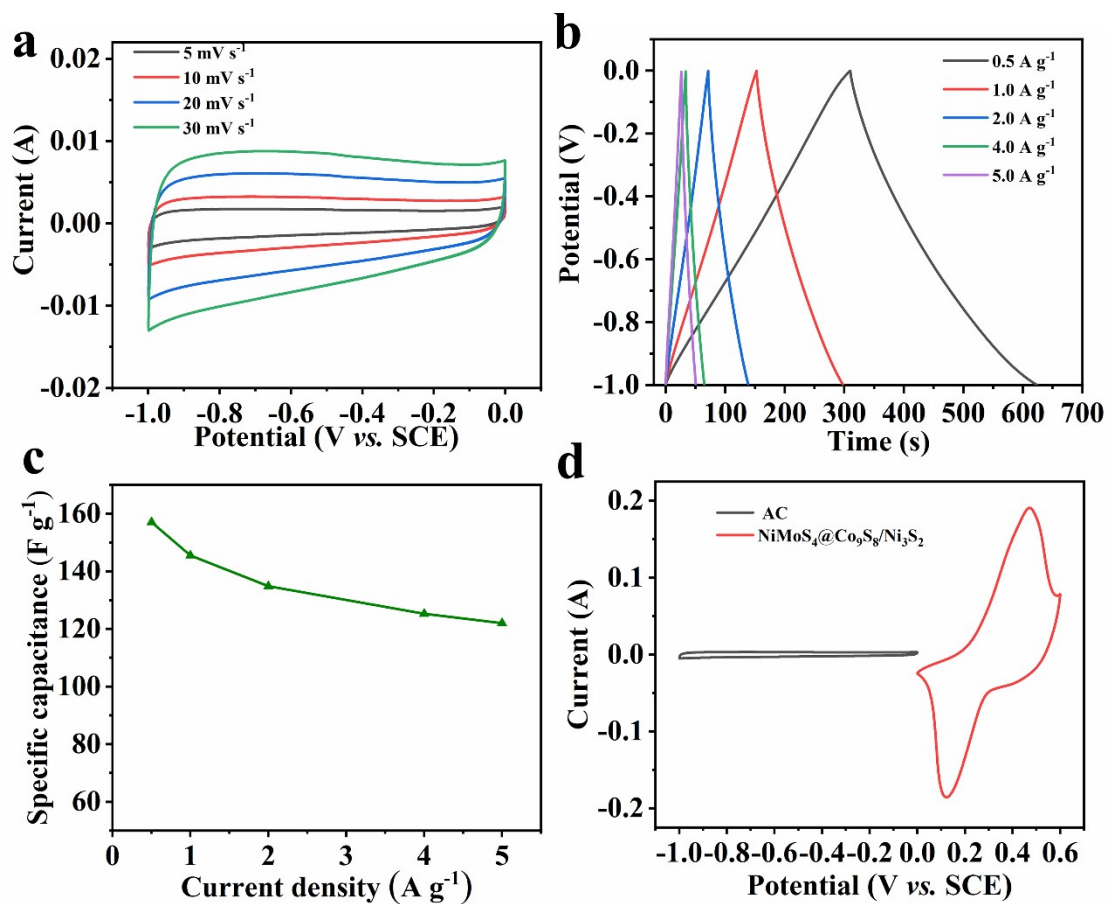

**Fig. S8.** Electrochemical performances of AC: (a) CV curves; (b) GCD curves; (c) Specific capacitance; (d) CV curves for the AC and NiMoS<sub>4</sub>@Co<sub>9</sub>S<sub>8</sub>/Ni<sub>3</sub>S<sub>2</sub> electrodes at 10 mV s<sup>-1</sup>.
